# Supplementary material for: Regional abnormality of functional connectivity is associated with clinical manifestations in individuals with intractable focal epilepsy
Source: PubMed Central journal article supplement (PMC7810833; doi:10.1038/s41598-021-81207-6), 2021-01-15
Supplement: 41598_2021_81207_MOESM1_ESM.pdf [file 41598_2021_81207_MOESM1_ESM.pdf]

**Supplementary materials for:**

**Regional abnormality of functional connectivity is associated with clinical manifestations in individuals with intractable focal epilepsy**

**Authors**

Yasuo Nakai\*<sup>a</sup>, Hiroki Nishibayashi<sup>a</sup>, Tomohiro Donishi<sup>b</sup>, Masaki Terada<sup>c</sup>, Naoyuki Nakao<sup>a</sup>, Yoshiki Kaneoke<sup>b</sup>

**Affiliations**

<sup>a</sup>Department of Neurological Surgery, <sup>b</sup>Department of System Neurophysiology, Wakayama Medical University, Wakayama, 641-8509, Japan, <sup>c</sup>Wakayama-Minami Radiology Clinic, Wakayama, 641-0012, Japan

Corresponding Author\*: Yasuo Nakai, MD.

Department of Neurological Surgery, Wakayama Medical University

811-1 Kimiidera, Wakayama, 641-8509, Japan.

Phone: +81-73-447-2300; E-mail: [ynakai@wakayama-med.ac.jp](mailto:ynakai@wakayama-med.ac.jp)

**Supplementary Table S1: Demographic data of 25 epilepsy patients**

| Case | Age<br>(years old) | Sex | Duration<br>(years) | Etiology   | Seizure type                                                                                     | Seizure<br>frequency | Number<br>of AEDs | Scalp EEG<br>IID/ictal | MRI findings<br>(lesion location)                                             | Type of epilepsy<br>(Estimated focus) | Pathology<br>(if applicable)                           |
|------|--------------------|-----|---------------------|------------|--------------------------------------------------------------------------------------------------|----------------------|-------------------|------------------------|-------------------------------------------------------------------------------|---------------------------------------|--------------------------------------------------------|
| 1    | 46                 | F   | 42                  | Structural | Focal, Aware, Motor Onset (tonic)                                                                | Daily                | 3                 | C4/<br>diffuse         | Focal cortical dysplasia<br>(R supplementary motor<br>area, cingulate cortex) | Focal (R F)                           | Focal cortical<br>dysplasia (I Ib)                     |
| 2    | 43                 | F   | 5                   | Structural | Focal, Impaired Awareness<br>Motor Onset (hyperkinetic)                                          | Monthly              | 1                 | NS                     | Focal cortical dysplasia<br>(R rectal gyrus, L frontal<br>gyrus)              | Focal (L F)                           |                                                        |
| 3    | 31                 | M   | 18                  | Structural | Focal, Aware, Motor Onset<br>(myoclonic)                                                         | Weekly               | 4                 | P4, C4/<br>non focal   | closed-lip<br>schizencephaly<br>(R central sulcus)                            | Multilobar (R.<br>FT)                 | Migratory neurons in<br>subcortical region,<br>gliosis |
| 4    | 19                 | M   | 12                  | Structural | Focal, Impaired Awareness, Motor<br>Onset (tonic)                                                | Daily,<br>nocturnal  | 4                 | T3, F7,<br>F3          | Polymicrogyria<br>(L temporoparietal<br>cortex)                               | Focal (L FT)                          | Dysembryoplastic<br>neuroepithelial tumor              |
| 5    | 51                 | M   | 22                  | Structural | Focal, Impaired awareness, Motor<br>Onset (automatism)                                           | Weekly               | 1                 | F7, T3                 | L temporal tip                                                                | TLE (L T)                             | Epidermoid                                             |
| 6    | 38                 | F   | 18                  | Structural | Focal Onset, Impaired Awareness,<br>Motor Onset (automatism), focal to<br>bilateral tonic-clonic | Daily                | 3                 | F7                     | L<br>amygdalohippocampus                                                      | TLE (L T)                             |                                                        |
| 7    | 45                 | F   | 39                  | Structural | Focal, Impaired Awareness, Motor<br>Onset (automatism)                                           | Monthly              | 2                 | F8                     | R hippocampus                                                                 | TLE (R T)                             |                                                        |

|    |    |   |    |            |                                                              |         |   |                         |                                     |                      |                  |
|----|----|---|----|------------|--------------------------------------------------------------|---------|---|-------------------------|-------------------------------------|----------------------|------------------|
| 8  | 66 | F | 26 | Structural | Focal, Impaired Awareness, Motor Onset (automatism)          | Weekly  | 5 | T3, Fp1                 | L mesial temporal lobe              | TLE (L. T)           | Low grade glioma |
| 9  | 45 | M | 25 | Infectious | Focal, Impaired Awareness, Motor Onset (automatism)          | Weekly  | 3 | F7, T3                  | L mesial temporal lobe              | TLE (L T)            |                  |
| 10 | 30 | F | 20 | Structural | Focal, Impaired Awareness, Non-Motor onset (behavior arrest) | Weekly  | 4 | bil.T, P, O/<br>diffuse | Bil. parietooccipital cortex        | Multilobar (Bil. PO) |                  |
| 11 | 23 | M | 1  | Structural | Focal, Aware, Motor Onset (tonic, clonic)                    | Monthly | 1 | F3, C3                  | Periventricular nodular heterotopia | Multilobar (L FP)    |                  |
| 12 | 41 | M | 27 | Structural | Focal, Impaired Awareness, Motor Onset (automatism)          | Weekly  | 3 | T4, T6 / T4, T6         | NS                                  | TLE (R T)            | Gliosis          |
| 13 | 16 | M | 1  | Unknown    | Focal, Aware, Motor Onset (tonic, clonic)                    | Weekly  | 2 | C4                      | NS                                  | Focal (R F)          |                  |
| 14 | 27 | M | 6  | Unknown    | Focal, Aware, Motor Onset (tonic, clonic)                    | Monthly | 2 | P3/ non focal           | NS                                  | Focal (R P)          |                  |
| 15 | 37 | M | 24 | Unknown    | Focal, Aware, Non-Motor Onset (cognitive)                    | Weekly  | 3 | T5, T3, O1              | NS                                  | Multilobar (L TO)    |                  |
| 16 | 40 | F | 37 | Unknown    | Focal, Aware, Motor Onset (tonic)                            | Weekly  | 3 | T3, F7/ T5, O1          | L hemispheric atrophy               | Multilobar (L TO)    |                  |
| 17 | 36 | M | 8  | Unknown    | Focal, Impaired Awareness, Motor Onset (automatism)          | Monthly | 3 | Fp1, F3, T3             | NS                                  | Focal (L F)          |                  |
| 18 | 27 | M | 23 | Unknown    | Focal, Impaired Awareness, Motor Onset (automatism)          | Weekly  | 3 | Fp1, F7/ F3, T3         | NS                                  | Multilobar (L FT)    |                  |

|    |    |   |    |         |                                                                                      |         |   |                          |    |                     |  |
|----|----|---|----|---------|--------------------------------------------------------------------------------------|---------|---|--------------------------|----|---------------------|--|
| 19 | 37 | M | 25 | Unknown | Focal, Impaired Awareness, Motor Onset (atonic)                                      | Monthly | 3 | F4, F3, Fp2, Fp1/diffuse | NS | Multilobar (Bil. F) |  |
| 20 | 51 | F | 41 | Unknown | Focal, Aware, Motor Onset (tonic), focal to bilateral tonic-clonic                   | Daily   | 3 | F8, F4, Fp2, Fp1         | NS | Multilobar (Bil. F) |  |
| 21 | 35 | M | 1  | Unknown | Focal, Impaired Awareness, Motor Onset (automatism), focal to bilateral tonic-clonic | Monthly | 1 | T4                       | NS | TLE (R T)           |  |
| 22 | 43 | M | 14 | Unknown | Focal, Aware, Non-motor onset (behavior arrest)                                      | Weekly  | 3 | F8 / F8                  | NS | TLE (R T)           |  |
| 23 | 70 | M | 3  | Unknown | Focal, Impaired Awareness, Motor Onset (automatism), focal to bilateral tonic-clonic | Monthly | 2 | F8, T4                   | NS | TLE (R T)           |  |
| 24 | 40 | F | 17 | Unknown | Focal, Impaired awareness, Motor Onset (automatism)                                  | Weekly  | 3 | T3                       | NS | TLE (L T)           |  |
| 25 | 41 | M | 41 | Unknown | Focal, Impaired Awareness, Motor Onset (automatism)                                  | Daily   | 4 | T3, P3, O1               | NS | Multilobar (L TPO)  |  |

Abbreviations; TLE: temporal lobe epilepsy, IID: interictal discharge, NS: no significant finding, L: left, R: right, Bil.: bilateral, F: frontal lobe, T: temporal lobe, P: parietal lobe, FT: fronto-parietal lobes, TO: temporo-occipital lobes, FP: fronto-parietal lobes, PO: parieto-occipital lobes, TPO: temporo-parieto-occipital lobes

## Supplementary Table S2: Definition of 388 anatomical regions

\*Regions in DMN. \*\* No. 1-368 in AICHA, No. 369-388 in AAL

| No. | Region name (Original Index**) |    |                              |    |                            |
|-----|--------------------------------|----|------------------------------|----|----------------------------|
|     |                                | 20 | G_Frontal_Mid-1-R (20)       | 40 | G_Frontal_Mid_Orb-2-R (40) |
| 1   | G_Frontal_Sup-1-L (1) *        | 21 | G_Frontal_Mid-2-L (21)       | 41 | G_Frontal_Inf_Orb-1-L (41) |
| 2   | G_Frontal_Sup-1-R (2) *        | 22 | G_Frontal_Mid-2-R (22)       | 42 | G_Frontal_Inf_Orb-1-R (42) |
| 3   | G_Frontal_Sup-2-L (3) *        | 23 | G_Frontal_Mid-3-L (23)*      | 43 | G_Frontal_Inf_Orb-2-L (43) |
| 4   | G_Frontal_Sup-2-R (4) *        | 24 | G_Frontal_Mid-3-R (24)       | 44 | G_Frontal_Inf_Orb-2-R (44) |
| 5   | G_Frontal_Sup-3-L (5) *        | 25 | G_Frontal_Mid-4-L (25)*      | 45 | S_Orbital-1-L (45)         |
| 6   | G_Frontal_Sup-3-R (6) *        | 26 | G_Frontal_Mid-4-R (26)       | 46 | S_Orbital-1-R (46)         |
| 7   | S_Sup_Frontal-1-L (7) *        | 27 | G_Frontal_Mid-5-L (27)       | 47 | S_Orbital-2-L (47)         |
| 8   | S_Sup_Frontal-1-R (8) *        | 28 | G_Frontal_Mid-5-R (28)       | 48 | S_Orbital-2-R (48)         |
| 9   | S_Sup_Frontal-2-L (9) *        | 29 | S_Inf_Frontal-1-L (29)       | 49 | S_Olfactory-1-L (49)       |
| 10  | S_Sup_Frontal-2-R (10)*        | 30 | S_Inf_Frontal-1-R (30)       | 50 | S_Olfactory-1-R (50)       |
| 11  | S_Sup_Frontal-3-L (11)*        | 31 | S_Inf_Frontal-2-L (31)       | 51 | S_Precentral-1-L (51)      |
| 12  | S_Sup_Frontal-3-R (12)*        | 32 | S_Inf_Frontal-2-R (32)       | 52 | S_Precentral-1-R (52)      |
| 13  | S_Sup_Frontal-4-L (13)*        | 33 | G_Frontal_Inf_Tri-1-L (33) * | 53 | S_Precentral-2-L (53)      |
| 14  | S_Sup_Frontal-4-R (14)*        | 34 | G_Frontal_Inf_Tri-1-R (34) * | 54 | S_Precentral-2-R (54)      |
| 15  | S_Sup_Frontal-5-L (15)         | 35 | G_Frontal_Sup_Orb-1-L (35)   | 55 | S_Precentral-3-L (55)      |
| 16  | S_Sup_Frontal-5-R (16)         | 36 | G_Frontal_Sup_Orb-1-R (36)   | 56 | S_Precentral-3-R (56)      |
| 17  | S_Sup_Frontal-6-L (17)         | 37 | G_Frontal_Mid_Orb-1-L (37)   | 57 | S_Precentral-4-L (57)      |
| 18  | S_Sup_Frontal-6-R (18)         | 38 | G_Frontal_Mid_Orb-1-R (38)   | 58 | S_Precentral-4-R (58)      |
| 19  | G_Frontal_Mid-1-L (19)         | 39 | G_Frontal_Mid_Orb-2-L (39)   | 59 | S_Precentral-5-L (59)      |
|     |                                |    |                              | 60 | S_Precentral-5-R (60)      |
|     |                                |    |                              | 61 | S_Precentral-6-L (61)      |
|     |                                |    |                              | 62 | S_Precentral-6-R (62)      |
|     |                                |    |                              | 63 | S_Rolando-1-L (63)         |
|     |                                |    |                              | 64 | S_Rolando-1-R (64)         |
|     |                                |    |                              | 65 | S_Rolando-2-L (65)         |
|     |                                |    |                              | 66 | S_Rolando-2-R (66)         |
|     |                                |    |                              | 67 | S_Rolando-3-L (67)         |
|     |                                |    |                              | 68 | S_Rolando-3-R (68)         |
|     |                                |    |                              | 69 | S_Rolando-4-L (69)         |
|     |                                |    |                              | 70 | S_Rolando-4-R (70)         |
|     |                                |    |                              | 71 | S_Postcentral-1-L (71)     |
|     |                                |    |                              | 72 | S_Postcentral-1-R (72)     |
|     |                                |    |                              | 73 | S_Postcentral-2-L (73)     |
|     |                                |    |                              | 74 | S_Postcentral-2-R (74)     |
|     |                                |    |                              | 75 | S_Postcentral-3-L (75)     |
|     |                                |    |                              | 76 | S_Postcentral-3-R (76)     |
|     |                                |    |                              | 77 | G_Parietal_Sup-1-L (77)    |
|     |                                |    |                              | 78 | G_Parietal_Sup-1-R (78)    |
|     |                                |    |                              | 79 | G_Parietal_Sup-2-L (79)    |

|                                 |                                          |                                  |                                |
|---------------------------------|------------------------------------------|----------------------------------|--------------------------------|
| 80 G_Parietal_Sup-2-R (80)      | 109 S_Intraparietal-1-L (109) *          | 136 G_Occipital_Mid-3-R(138)     | 165 G_Temporal_Sup-4-L (167)   |
| 81 G_Parietal_Sup-3-L (81)      | 110 S_Intraparietal-1-R (110) *          | 137 G_Occipital_Mid-4-L(139) *   | 166 G_Temporal_Sup-4-R (168)   |
| 82 G_Parietal_Sup-3-R (82)      | 111 S_Intraparietal-2-L (111) *          | 138 G_Occipital_Mid-4-R(140) *   | 167 S_Sup_Temporal-1-L (169) * |
| 83 G_Parietal_Sup-4-L (83)      | 112 S_Intraparietal-2-R (112) *          | 139 G_Occipital_Inf-1-L (141)    | 168 S_Sup_Temporal-1-R (170) * |
| 84 G_Parietal_Sup-4-R (84)      | 113 S_Intraparietal-3-L (113) *          | 140 G_Occipital_Inf-1-R (142)    | 169 S_Sup_Temporal-2-L (171) * |
| 85 G_Parietal_Sup-5-L (85)      | 114 S_Intraparietal-3-R (114) *          | 141 G_Occipital_Inf-2-L (143)    | 170 S_Sup_Temporal-2-R (172) * |
| 86 G_Parietal_Sup-5-R (86)      | 115 S_Intraoccipital_G_Occipital_Mid-1-L | 142 G_Occipital_Inf-2-R (144)    | 171 S_Sup_Temporal-3-L (173)   |
| 87 G_Supramarginal-1-L(87)      | (115, 133)                               | 143 G_Insula-anterior-1-L(145)   | 172 S_Sup_Temporal-3-R (174)   |
| 88 G_Supramarginal-1-R(88)      | 116 S_Intraoccipital-G_Occipital_Mid-1-R | 144 G_Insula-anterior-1-R(146)   | 173 S_Sup_Temporal-4-L (175)   |
| 89 G_SupraMarginal-2-L (89)     | (116, 134)                               | 145 G_Insula-anterior-2-L(147)   | 174 S_Sup_Temporal-4-R (176)   |
| 90 G_SupraMarginal-2-R (90)     | 117 G_Occipital_Pole-1-L(117)            | 146 G_Insula-anterior-2-R(148)   | 175 S_Sup_Temporal-5-L (177) * |
| 91 G_Supramarginal-3-L(91)      | 118 G_Occipital_Pole-1-R(118)            | 147 G_Insula-anterior-3-L(149)   | 176 S_Sup_Temporal-5-R (178) * |
| 92 G_Supramarginal-3-R(92)      | 119 G_Occipital_Lat-1-L (119)            | 148 G_Insula-anterior-3-R(150)   | 177 G_Temporal_Mid-1-L(179) *  |
| 93 G_Supramarginal-4-L(93)      | 120 G_Occipital_Lat-1-R (120)            | 149 G_Insula-anterior-4-L(151)   | 178 G_Temporal_Mid-1-R(180) *  |
| 94 G_Supramarginal-4-R(94)      | 121 G_Occipital_Lat-2-L (121)            | 150 G_Insula-anterior-4-R(152)   | 179 G_Temporal_Mid-2-L(181)    |
| 95 G_SupraMarginal-5-L(95)      | 122 G_Occipital_Lat-2-R (122)            | 151 G_Insula-anterior-5-L(153)   | 180 G_Temporal_Mid-2-R (182)   |
| 96 G_SupraMarginal-5-R (96)     | 123 G_Occipital_Lat-3-L (123)            | 152 G_Insula-anterior-5-R(154)   | 181 G_Temporal_Mid-3-L (183) * |
| 97 G_SupraMarginal-6-L(97)      | 124 G_Occipital_Lat-3-R (124)            | 153 G_Insula-posterior-1-L(155)  | 182 G_Temporal_Mid-3-R (184) * |
| 98 G_SupraMarginal-6-R (98)     | 125 G_Occipital_Lat-4-L (125)            | 154 G_Insula-posterior-1-R (156) | 183 G_Temporal_Mid-4-L (185)   |
| 99 G_SupraMarginal-7-L(99) *    | 126 G_Occipital_Lat-4-R (126)            | 155 G_Rolandic_Oper-1-L(157)     | 184 G_Temporal_Mid-4-R (186)   |
| 100 G_SupraMarginal-7-R (100) * | 127 G_Occipital_Lat-5-L (127)            | 156 G_Rolandic_Oper-1-R(158)     | 185 G_Temporal_Inf-1-L (187)   |
| 101 G_Angular-1-L (101) *       | 128 G_Occipital_Lat-5-R (128)            | 157 G_Rolandic_Oper-2-L(159)     | 186 G_Temporal_Inf-1-R (188)   |
| 102 G_Angular-1-R (102) *       | 129 G_Occipital_Sup-1-L (129)            | 158 G_Rolandic_Oper-2-R(160)     | 187 G_Temporal_Inf-2-L (189)   |
| 103 G_Angular-2-L (103) *       | 130 G_Occipital_Sup-1-R (130)            | 159 G_Temporal_Sup-1-L (161)     | 188 G_Temporal_Inf-2-R (190)   |
| 104 G_Angular-2-R (104) *       | 131 G_Occipital_Sup-2-L (131)            | 160 G_Temporal_Sup-1-R (162)     | 189 G_Temporal_Inf-3-L (191)   |
| 105 G_Angular-3-L (105) *       | 132 G_Occipital_Sup-2-R (132)            | 161 G_Temporal_Sup-2-L (163)     | 190 G_Temporal_Inf-3-R (192)   |
| 106 G_Angular-3-R (106) *       | 133 G_Occipital_Mid-2-L(135)             | 162 G_Temporal_Sup-2-R (164)     | 191 G_Temporal_Inf-4-L (193)   |
| 107 G_Parietal_Inf-1-L (107) *  | 134 G_Occipital_Mid-2-R(136)             | 163 G_Temporal_Sup-3-L (165)     | 192 G_Temporal_Inf-4-R (194)   |
| 108 G_Parietal_Inf-1-R (108) *  | 135 G_Occipital_Mid-3-L(137)             | 164 G_Temporal_Sup-3-R (166)     | 193 G_Temporal_Inf-5-L (195)   |

|                                      |                                        |                                    |                                  |
|--------------------------------------|----------------------------------------|------------------------------------|----------------------------------|
| 194 G_Temporal_Inf-5-R (196)         | 223 G_Supp_Motor_Area-3-L (225)        | 252 G_Paracentral_Lobule-1-R (258) | 281 S_Parietooccipital-3-L (287) |
| 195 G_Temporal_Pole_Sup-1-L (197) *  | 224 G_Supp_Motor_Area-3-R (226)        | 253 G_Paracentral_Lobule-2-L (259) | 282 S_Parietooccipital-3-R (288) |
| 196 G_Temporal_Pole_Sup-1-R (198) *  | 225 S_Cingulate-1-L (227) *            | 254 G_Paracentral_Lobule-2-R (260) | 283 S_Parietooccipital-4-L (289) |
| 197 G_Temporal_Pole_Sup-2-L (199) *  | 226 S_Cingulate-1-R (228) *            | 255 G_Paracentral_Lobule-3-L (261) | 284 S_Parietooccipital-4-R (290) |
| 198 G_Temporal_Pole_Sup-2-R (200) *  | 227 S_Cingulate-2-L (229)              | 256 G_Paracentral_Lobule-3-R (262) | 285 S_Parietooccipital-5-L (291) |
| 199 G_Temporal_Pole_Mid-1-L (201)    | 228 S_Cingulate-2-R (230)              | 257 G_Paracentral_Lobule-4-L (263) | 286 S_Parietooccipital-5-R (292) |
| 200 G_Temporal_Pole_Mid-1-R (202)    | 229 S_Cingulate-3-L (231)              | 258 G_Paracentral_Lobule-4-R (264) | 287 S_Parietooccipital-6-L (293) |
| 201 G_Temporal_Pole_Mid-2-L (203)    | 230 S_Cingulate-3-R (232)              | 259 G_Precuneus-1-L (265) *        | 288 S_Parietooccipital-6-R (294) |
| 202 G_Temporal_Pole_Mid-2-R (204)    | 231 S_Cingulate-4-L (233)              | 260 G_Precuneus-1-R (266) *        | 289 G_Cuneus-1-L (295)           |
| 203 G_Temporal_Pole_Mid-3-L (205)    | 232 S_Cingulate-4-R (234)              | 261 G_Precuneus-2-L (267) *        | 290 G_Cuneus-1-R (296)           |
| 204 G_Temporal_Pole_Mid-3-R (206)    | 233 S_Cingulate-5-L (235)              | 262 G_Precuneus-2-R (268) *        | 291 G_Cuneus-2-L (297)           |
| 205 G_Frontal_Sup_Medial-1-L (207) * | 234 S_Cingulate-5-R (236)              | 263 G_Precuneus-3-L (269) *        | 292 G_Cuneus-2-R (298)           |
| 206 G_Frontal_Sup_Medial-1-R (208) * | 235 S_Cingulate-6-L (237) *            | 264 G_Precuneus-3-R (270) *        | 293 G_Calcarine-1-L (299)        |
| 207 G_Frontal_Sup_Medial-2-L (209) * | 236 S_Cingulate-6-R (238) *            | 265 G_Precuneus-4-L (271) *        | 294 G_Calcarine-1-R (300)        |
| 208 G_Frontal_Sup_Medial-2-R (210) * | 237 S_Cingulate-7-L (239) *            | 266 G_Precuneus-4-R (272) *        | 295 G_Calcarine-2-L (301)        |
| 209 G_Frontal_Sup_Medial-3-L (211) * | 238 S_Cingulate-7-R (240) *            | 267 G_Precuneus-5-L (273) *        | 296 G_Calcarine-2-R (302)        |
| 210 G_Frontal_Sup_Medial-3-R (212) * | 239 G_Cingulum_Ant-1-L(241) *          | 268 G_Precuneus-5-R (274) *        | 297 G_Calcarine-3-L (303)        |
| 211 S_Anterior_Rostral-1-L (213) *   | 240 G_Cingulum_Ant-1-R (242) *         | 269 G_Precuneus-6-L (275) *        | 298 G_Calcarine-3-R (304)        |
| 212 S_Anterior_Rostral-1-R (214) *   | 241 G_Cingulum_Ant-2-L(243) *          | 270 G_Precuneus-6-R (276) *        | 299 G_Lingual-1-L (305) *        |
| 213 G_Frontal_Med_Orb-1-L (215) *    | 242 G_Cingulum_Ant-2-R (244) *         | 271 G_Precuneus-7-L (277) *        | 300 G_Lingual-1-R (306) *        |
| 214 G_Frontal_Med_Orb-1-R (216) *    | 243 G_Cingulum_Mid-1_2-L (245, 247)    | 272 G_Precuneus-7-R (278) *        | 301 G_Lingual-2-L (307)          |
| 215 G_Frontal_Med_Orb-2-L (217)      | 244 G_Cingulum_Mid-1_2-R (246, 248)    | 273 G_Precuneus-8-L (279) *        | 302 G_Lingual-2-R (308)          |
| 216 G_Frontal_Med_Orb-2- (218)       | 245 G_Cingulum_Mid-3-L (249)           | 274 G_Precuneus-8-R (280) *        | 303 G_Lingual-3-L (309)          |
| 217 G_subcallosal-1-L (219)          | 246 G_Cingulum_Mid-3-R (250)           | 275 G_Precuneus-9-L (281) *        | 304 G_Lingual-3-R (310)          |
| 218 G_subcallosal-1-R (220)          | 247 G_Cingulum_Post-1-L (251) *        | 276 G_Precuneus-9-R (282) *        | 305 G_Lingual-4-L (311)          |
| 219 G_Supp_Motor_Area-1-L (221)      | 248 G_Cingulum_Post-1-R (252) *        | 277 S_Parietooccipital-1-L (283)   | 306 G_Lingual-4-R (312)          |
| 220 G_Supp_Motor_Area-1-R (222)      | 249 G_Cingulum_Post-2_3-L (253, 255) * | 278 S_Parietooccipital-1-R (284)   | 307 G_Lingual-5-L (313)          |
| 221 G_Supp_Motor_Area-2-L (223)      | 250 G_Cingulum_Post-2_3-R (254, 256) * | 279 S_Parietooccipital-2-L (285)   | 308 G_Lingual-5-R (314)          |
| 222 G_Supp_Motor_Area-2-R (224)      | 251 G_Paracentral_Lobule-1-L (257)     | 280 S_Parietooccipital-2-R (286)   | 309 G_Lingual-6-L (315)          |

|                                                        |                                |                                              |
|--------------------------------------------------------|--------------------------------|----------------------------------------------|
| 310 G_Lingual-6-R (316)                                | 337 N_Caudate-3-L (351)        | 366 N_Thalamus-8-R (382)                     |
| 311 G_Hippocampus-1-L (317)                            | 338 N_Caudate-3-R (352)        | 367 N_Thalamus-9-L (383)                     |
| 312 G_Hippocampus-1-R (318)                            | 339 N_Caudate-4-L (353)        | 368 N_Thalamus-9-R (384)                     |
| 313 G_Hippocampus-2-L (319)                            | 340 N_Caudate-4-R (354)        | 369 Cerebelum_Crus1_L (9001)                 |
| 314 G_Hippocampus-2-R (320)                            | 341 N_Caudate-5-L (355)        | 370 Cerebelum_Crus1_R (9002)                 |
| 315 G_ParaHippocampal-1_2_3-L (321, 323, 342<br>325) * | 342 N_Caudate-5-R (356)        | 371 Cerebelum_Crus2_L (9011)                 |
| 316 G_ParaHippocampal-1_2_3-R (322, 324, 344<br>326) * | 343 N_Caudate-6_7-L (357, 359) | 372 Cerebelum_Crus2_R (9012)                 |
| 317 G_ParaHippocampal-4-L (327) *                      | 345 N_Pallidum-1-L (361)       | 373 Cerebelum_3_L (9021)                     |
| 318 G_ParaHippocampal-4-R (328) *                      | 346 N_Pallidum-1-R (362)       | 374 Cerebelum_3_R (9022)                     |
| 319 G_ParaHippocampal-5-L (329) *                      | 347 N_Putamen-2-L (363)        | 375 Cerebelum_4_5_L (9031)                   |
| 320 G_ParaHippocampal-5-R (330) *                      | 348 N_Putamen-2-R (364)        | 376 Cerebelum_4_5_R (9032)                   |
| 321 G_Fusiform-1-L (331)                               | 349 N_Putamen-3-L (365)        | 377 Cerebelum_6_L (9041)                     |
| 322 G_Fusiform-1-R (332)                               | 350 N_Putamen-3-R (366)        | 378 Cerebelum_6_R (9042)                     |
| 323 G_Fusiform-2-L (333)                               | 351 N_Thalamus-1-L (367)       | 379 Cerebelum_7b_L (9051)                    |
| 324 G_Fusiform-2-R (334)                               | 352 N_Thalamus-1-R (368)       | 380 Cerebelum_7b_R (9052)                    |
| 325 G_Fusiform-3-L (335)                               | 353 N_Thalamus-2-L (369)       | 381 Cerebelum_8_9_10_L(9061, 9071,<br>9081)  |
| 326 G_Fusiform-3-R (336)                               | 354 N_Thalamus-2-R (370)       | 382 Cerebelum_8_9_10_R (9062, 9072,<br>9082) |
| 327 G_Fusiform-4_5-L (337, 339)                        | 355 N_Thalamus-3-L (371)       | 383 Vermis_1_2_3 (9100, 9110)                |
| 328 G_Fusiform-4_5-R (338, 340)                        | 356 N_Thalamus-3-R (372)       | 384 Vermis_4_5 (9120)                        |
| 329 G_Fusiform-6-L (341)                               | 357 N_Thalamus-4-L (373)       | 385 Vermis_6 (9130)                          |
| 330 G_Fusiform-6-R (342)                               | 358 N_Thalamus-4-R (374)       | 386 Vermis_7 (9140)                          |
| 331 G_Fusiform-7-L (343)                               | 359 N_Thalamus-5-L (375)       | 387 Vermis_8 (9150)                          |
| 332 G_Fusiform-7-R (344)                               | 360 N_Thalamus-5-R (376)       | 388 Vermis_9_10 (9160, 9170)                 |
| 333 N_Amygdala-1-L (345)                               | 361 N_Thalamus-6-L (377)       |                                              |
| 334 N_Amygdala-1-R (346)                               | 362 N_Thalamus-6-R (378)       |                                              |
| 335 N_Caudate-1_2-L (347, 349)                         | 363 N_Thalamus-7-L (379)       |                                              |
| 336 N_Caudate-1_2-R (348, 350)                         | 364 N_Thalamus-7-R (380)       |                                              |
|                                                        | 365 N_Thalamus-8-L (381)       |                                              |



**Supplementary Table S3: Percentage of abnormal regions within the DMN, and Chi-square test for comparing it with the expected value for 25 epilepsy patients**

| Case | aR0                 |               |                 | aR1                 |               |                 |
|------|---------------------|---------------|-----------------|---------------------|---------------|-----------------|
|      | (%)                 | chi2_value    | p-value         | (%)                 | chi2_value    | p-value         |
| 1    | 1/14 (7.1)          | -             | -               | 3/11 (27.3)         | 0.013307      | 0.90816         |
| 2    | 8/19 (42.1)         | 2.7856        | 0.095118        | 11/32 (34.4)        | 1.3489        | 0.24547         |
| 3    | 10/37 (27.0)        | 0.033611      | 0.85454         | 0/17 (0.0)          | -             | -               |
| 4    | <b>12/21 (57.1)</b> | <b>11.42</b>  | <b>0.000726</b> | <b>14/23 (60.9)</b> | <b>15.742</b> | <b>7.26E-05</b> |
| 5    | 17/54 (31.5)        | 1.0685        | 0.30129         | 7/46 (15.2)         | -             | -               |
| 6    | 5/20 (25.0)         | -             | -               | 0/4 (0.0)           | -             | -               |
| 7    | <b>18/21 (85.7)</b> | <b>41.697</b> | <b>1.07E-10</b> | <b>41/56 (73.2)</b> | <b>76.995</b> | <b>1.71E-18</b> |
| 8    | <b>12/29 (41.4)</b> | <b>3.9902</b> | <b>0.045765</b> | 13/40 (32.5)        | 1.0549        | 0.30439         |
| 9    | 5/17 (29.4)         | 0.12304       | 0.72576         | 5/18 (27.8)         | 0.039648      | 0.84217         |
| 10   | 2/22 (9.1)          | -             | -               | 0/3 (0.0)           | -             | -               |
| 11   | <b>5/8 (62.5)</b>   | <b>5.7594</b> | <b>0.016401</b> | <b>2/2 (100.0)</b>  | <b>5.7898</b> | <b>0.016119</b> |
| 12   | 3/16 (18.8)         | -             | -               | 0/27 (0.0)          | -             | -               |
| 13   | 0/11 (0.0)          | -             | -               | 0/2 (0.0)           | -             | -               |
| 14   | 6/18 (33.3)         | 0.56394       | 0.45268         | <b>9/18 (50.0)</b>  | <b>5.7912</b> | <b>0.016107</b> |
| 15   | <b>19/33 (57.6)</b> | <b>19.068</b> | <b>1.26E-05</b> | <b>26/41 (63.4)</b> | <b>33.954</b> | <b>5.64E-09</b> |
| 16   | <b>33/58 (56.9)</b> | <b>34.529</b> | <b>4.2E-09</b>  | <b>43/68 (63.2)</b> | <b>60.485</b> | <b>7.42E-15</b> |
| 17   | 3/15 (20.0)         | -             | -               | 3/30 (10.0)         | -             | -               |
| 18   | 7/20 (35.0)         | 0.9384        | 0.33269         | 1/11 (9.1)          | -             | -               |
| 19   | 8/30 (26.7)         | 0.013568      | 0.90727         | 14/37 (37.8)        | 3.1119        | 0.077722        |
| 20   | 13/35 (37.1)        | 2.5995        | 0.1069          | <b>25/37(67.6)</b>  | <b>37.345</b> | <b>9.9E-10</b>  |
| 21   | 5/10 (50.0)         | 3.1492        | 0.075963        | 4/8 (50.0)          | 2.5061        | 0.11341         |
| 22   | 1/5 (20.0)          | -             | -               | 0/2 (0.0)           | -             | -               |
| 23   | 0/12 (0.0)          | -             | -               | 0/5 (0.0)           | -             | -               |
| 24   | 4/20 (20.0)         | -             | -               | 8/37 (21.6)         | -             | -               |
| 25   | 8/35 (22.9)         | -             | -               | 7/26 (26.9)         | 0.019261      | 0.88962         |

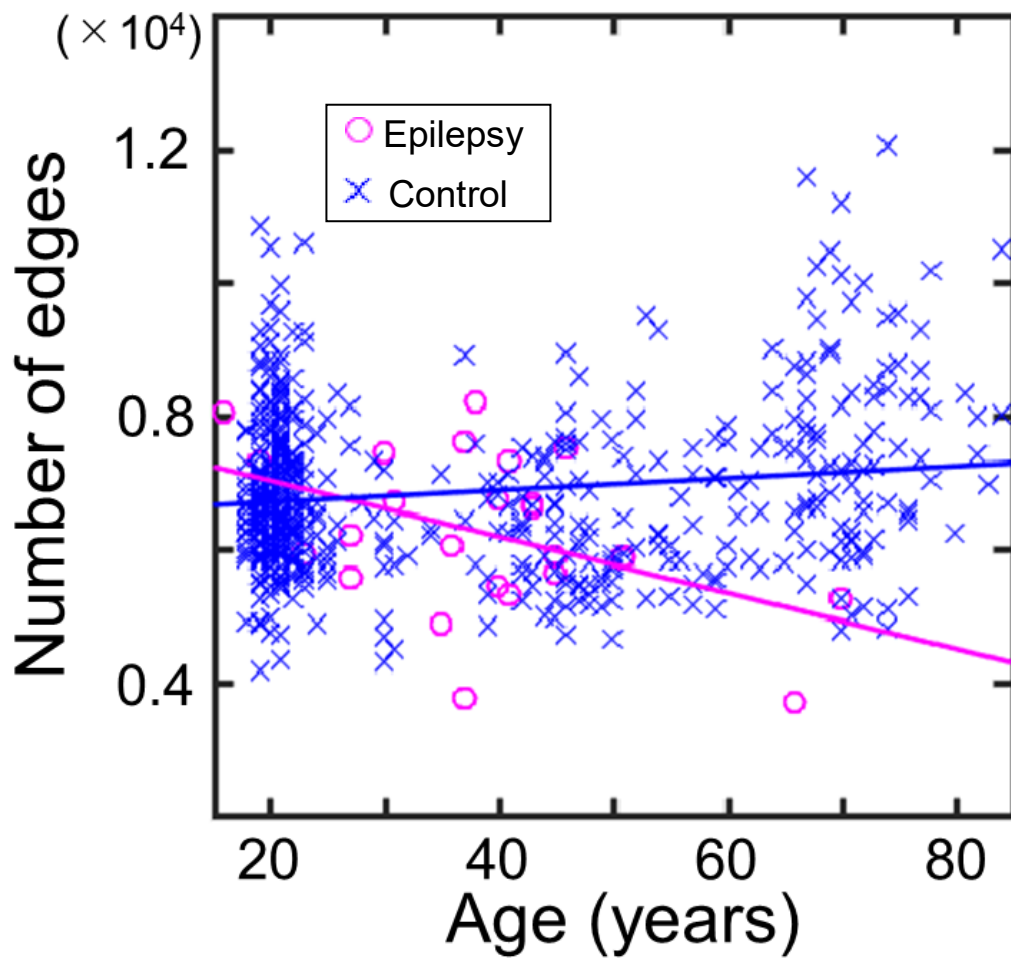

**Supplementary Figure S1: Distributions of mean nAC values and the number of edges for each group.**

The number of edges was significantly different between controls and epilepsy patients ( $df = 1$ ,  $F = 7.19$ ,  $p = 0.0075$ , ANCOVA with age as a nuisance covariate). There was also significant interaction between group and age ( $df = 1$ ,  $F = 6.97$ ,  $p = 0.0085$ ).

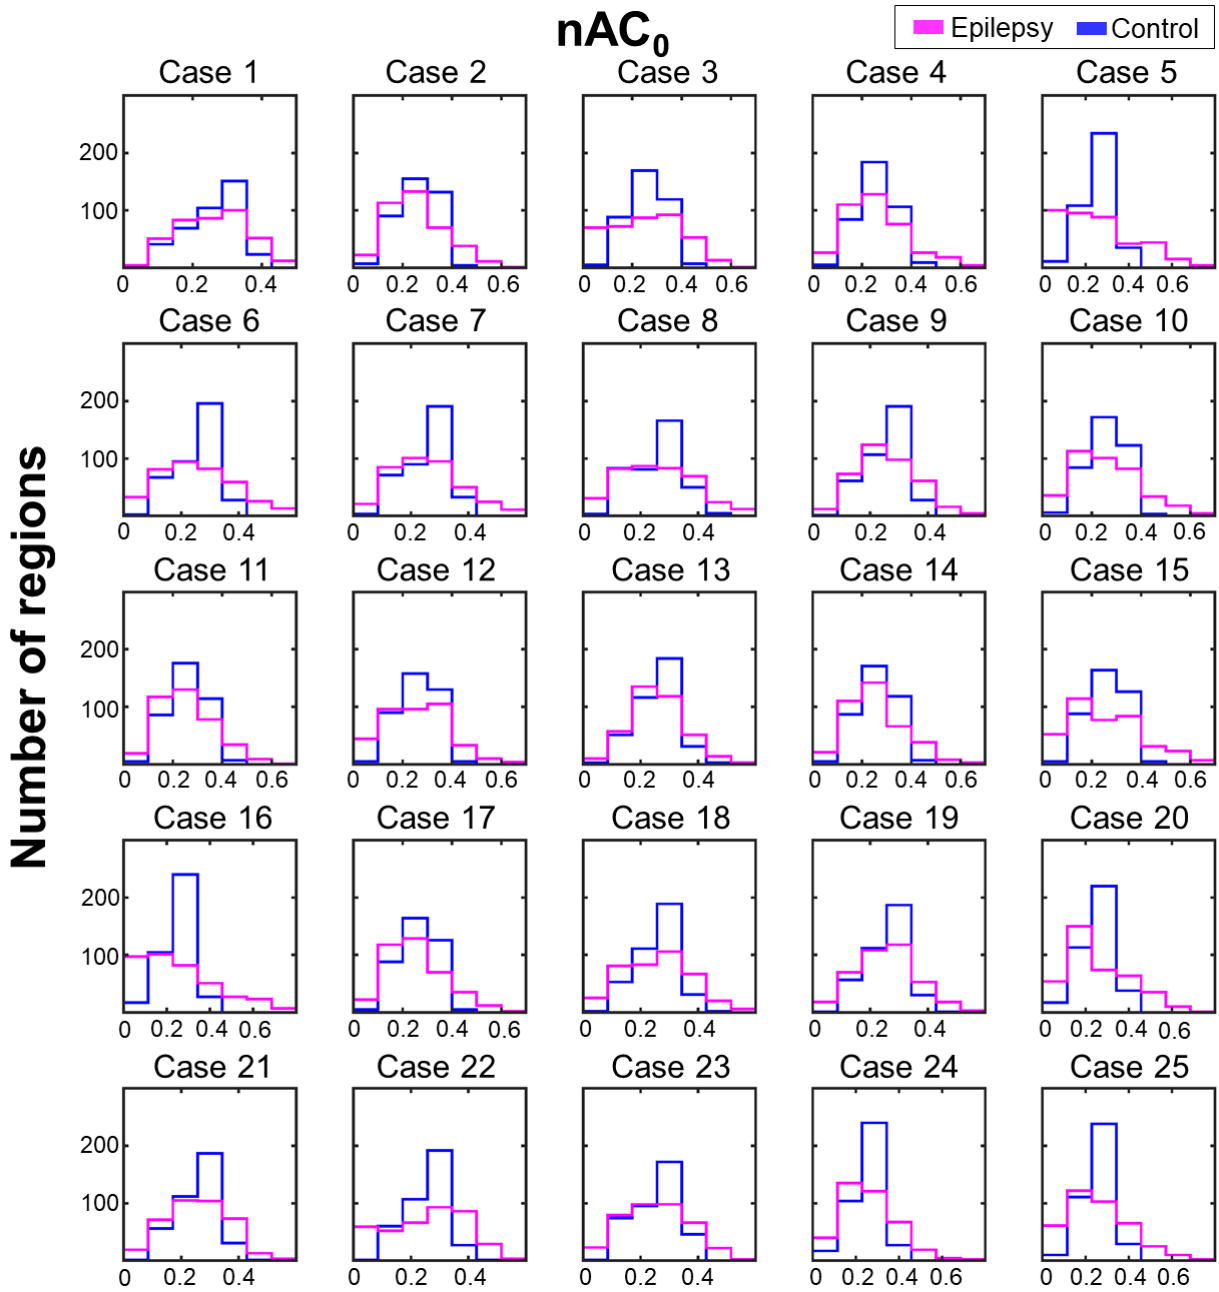

**Supplementary Figure S2: The distributions of nAC<sub>0</sub> for all cases**

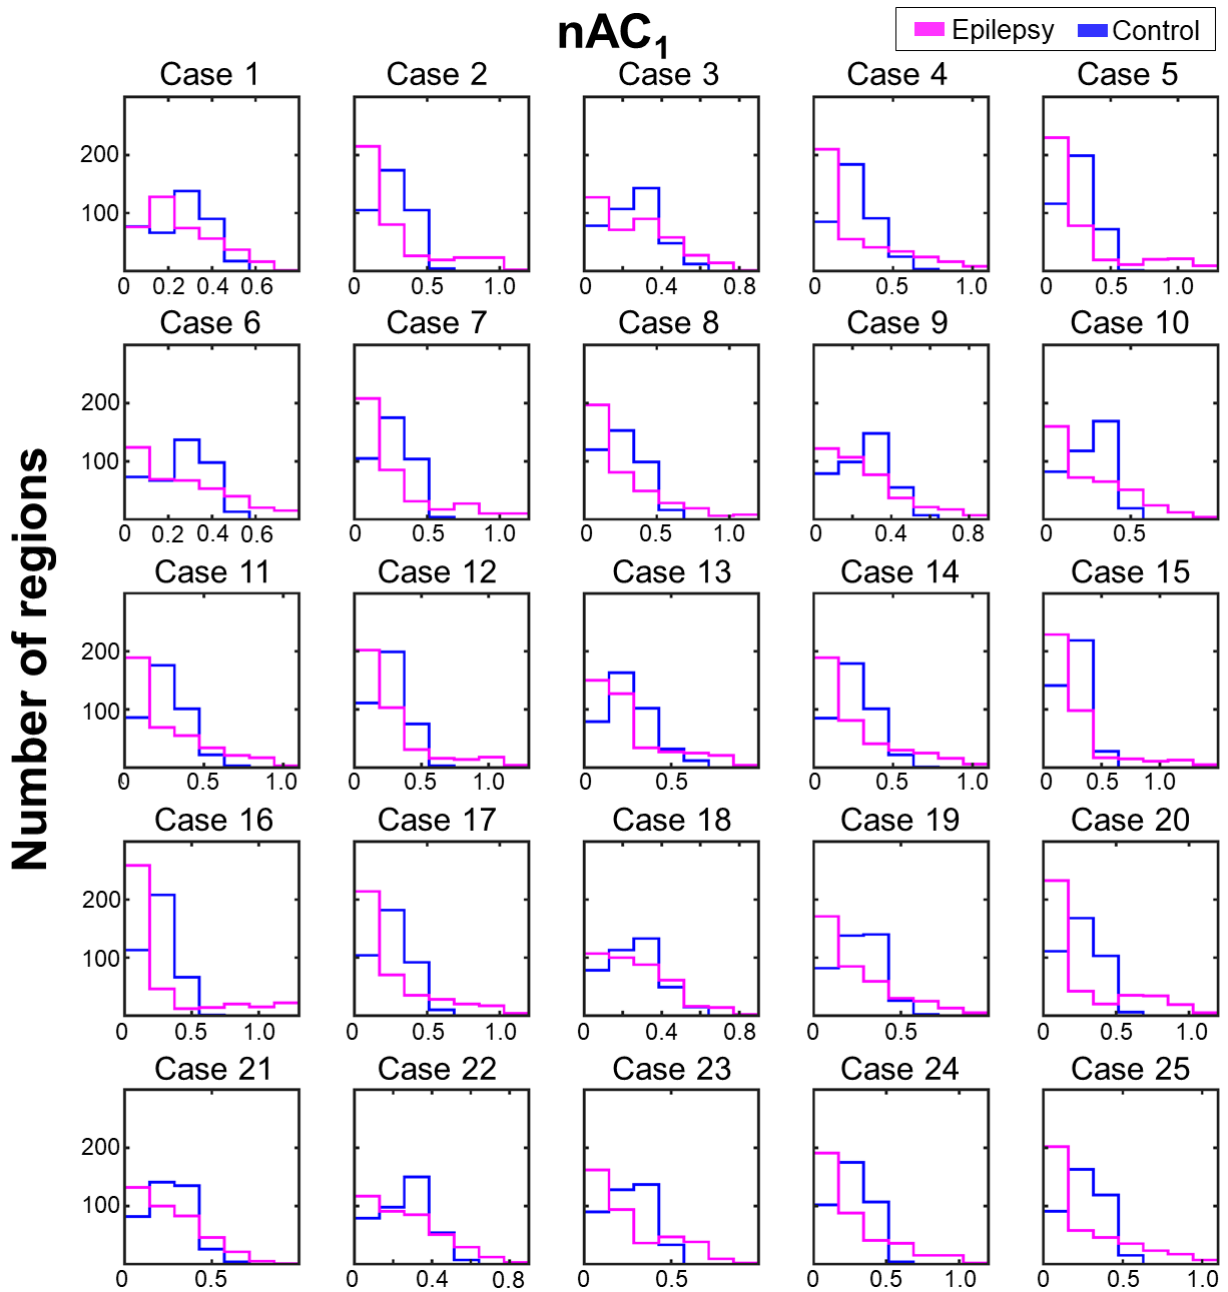

**Supplementary Figure S3: The distributions of nAC<sub>1</sub> for all cases**

**nAC<sub>0</sub>**

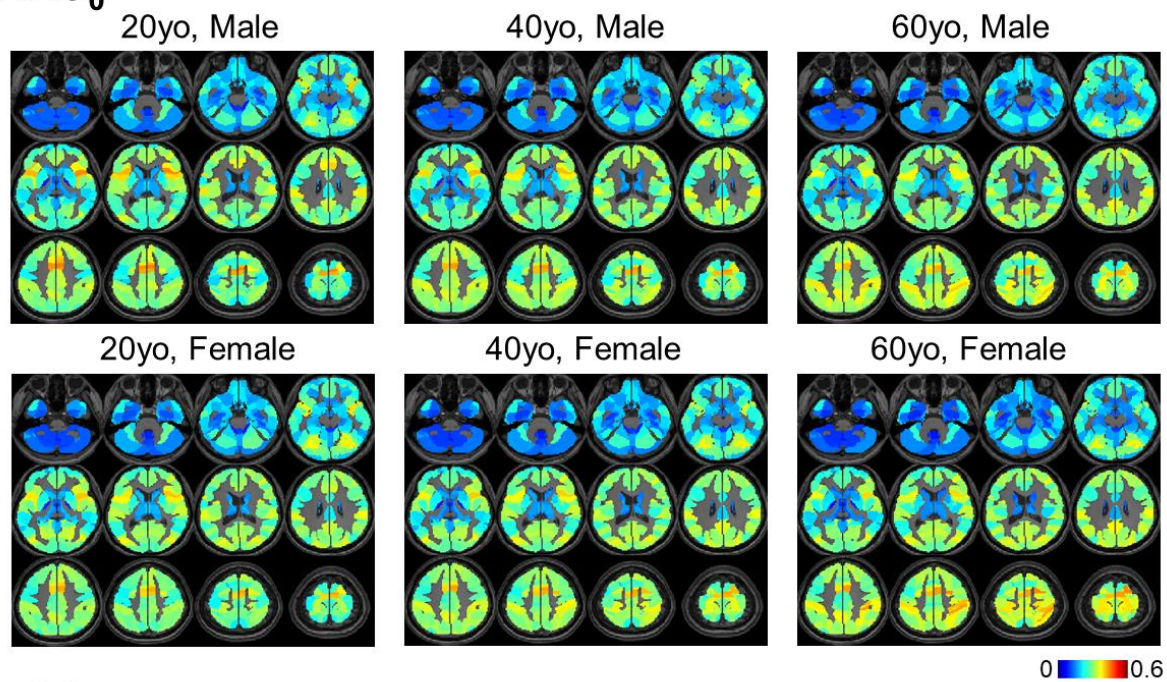

**nAC<sub>1</sub>**

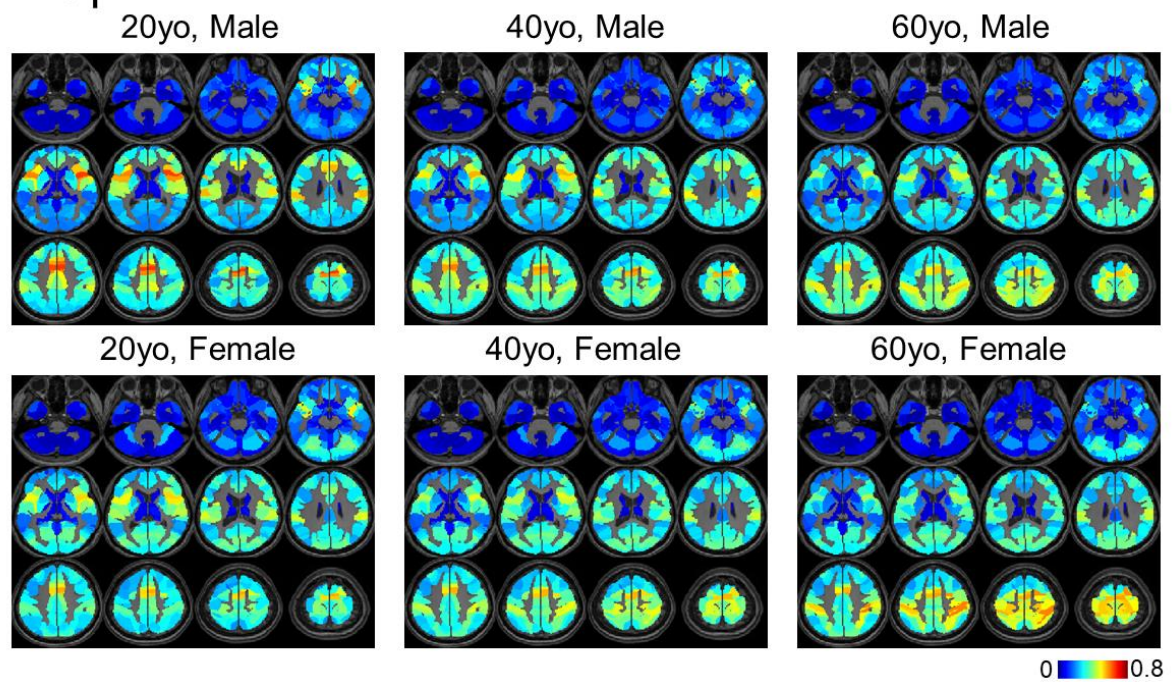

**Supplementary Figure S4: The spatial distributions of nAC<sub>0</sub> and nAC<sub>1</sub> for 20, 40, and 60 years old for males and females.**

The values for each age were calculated by the linear regression of the healthy control data for each sex.

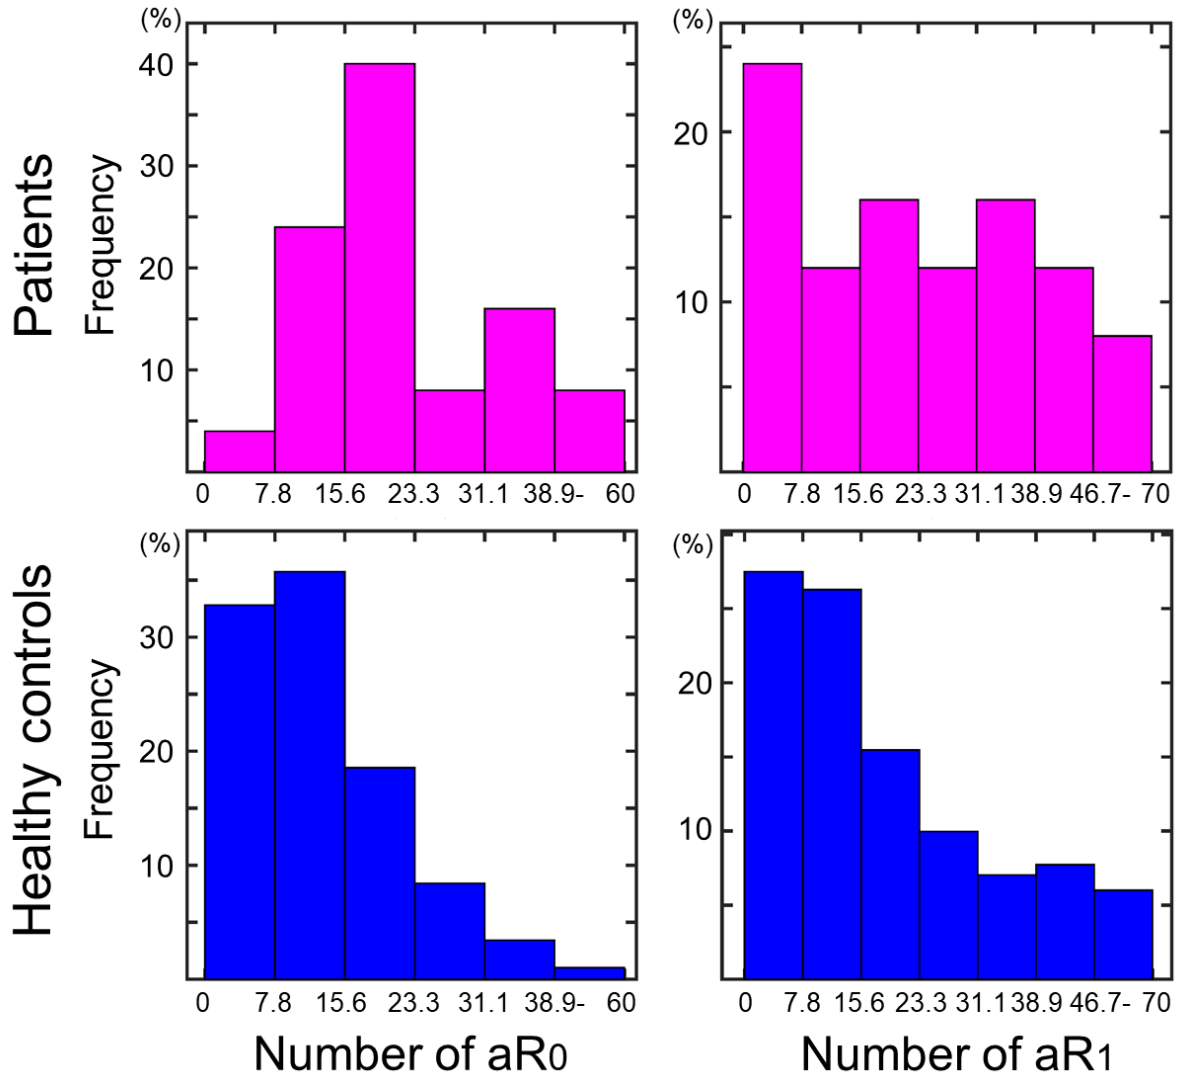

**Supplementary Figure S5: The relative frequency distributions of the number of  $R_0$  and  $aR_1$  for epilepsy patients and healthy controls.**

Chi-square tests revealed that distributions for the patients were significantly different from those for control data ( $\chi^2 = 147$ ,  $p < 0.00001$  for  $aR_0$ ;  $\chi^2 = 23.04$ ,  $p = 0.00078$  for  $aR_1$ ).

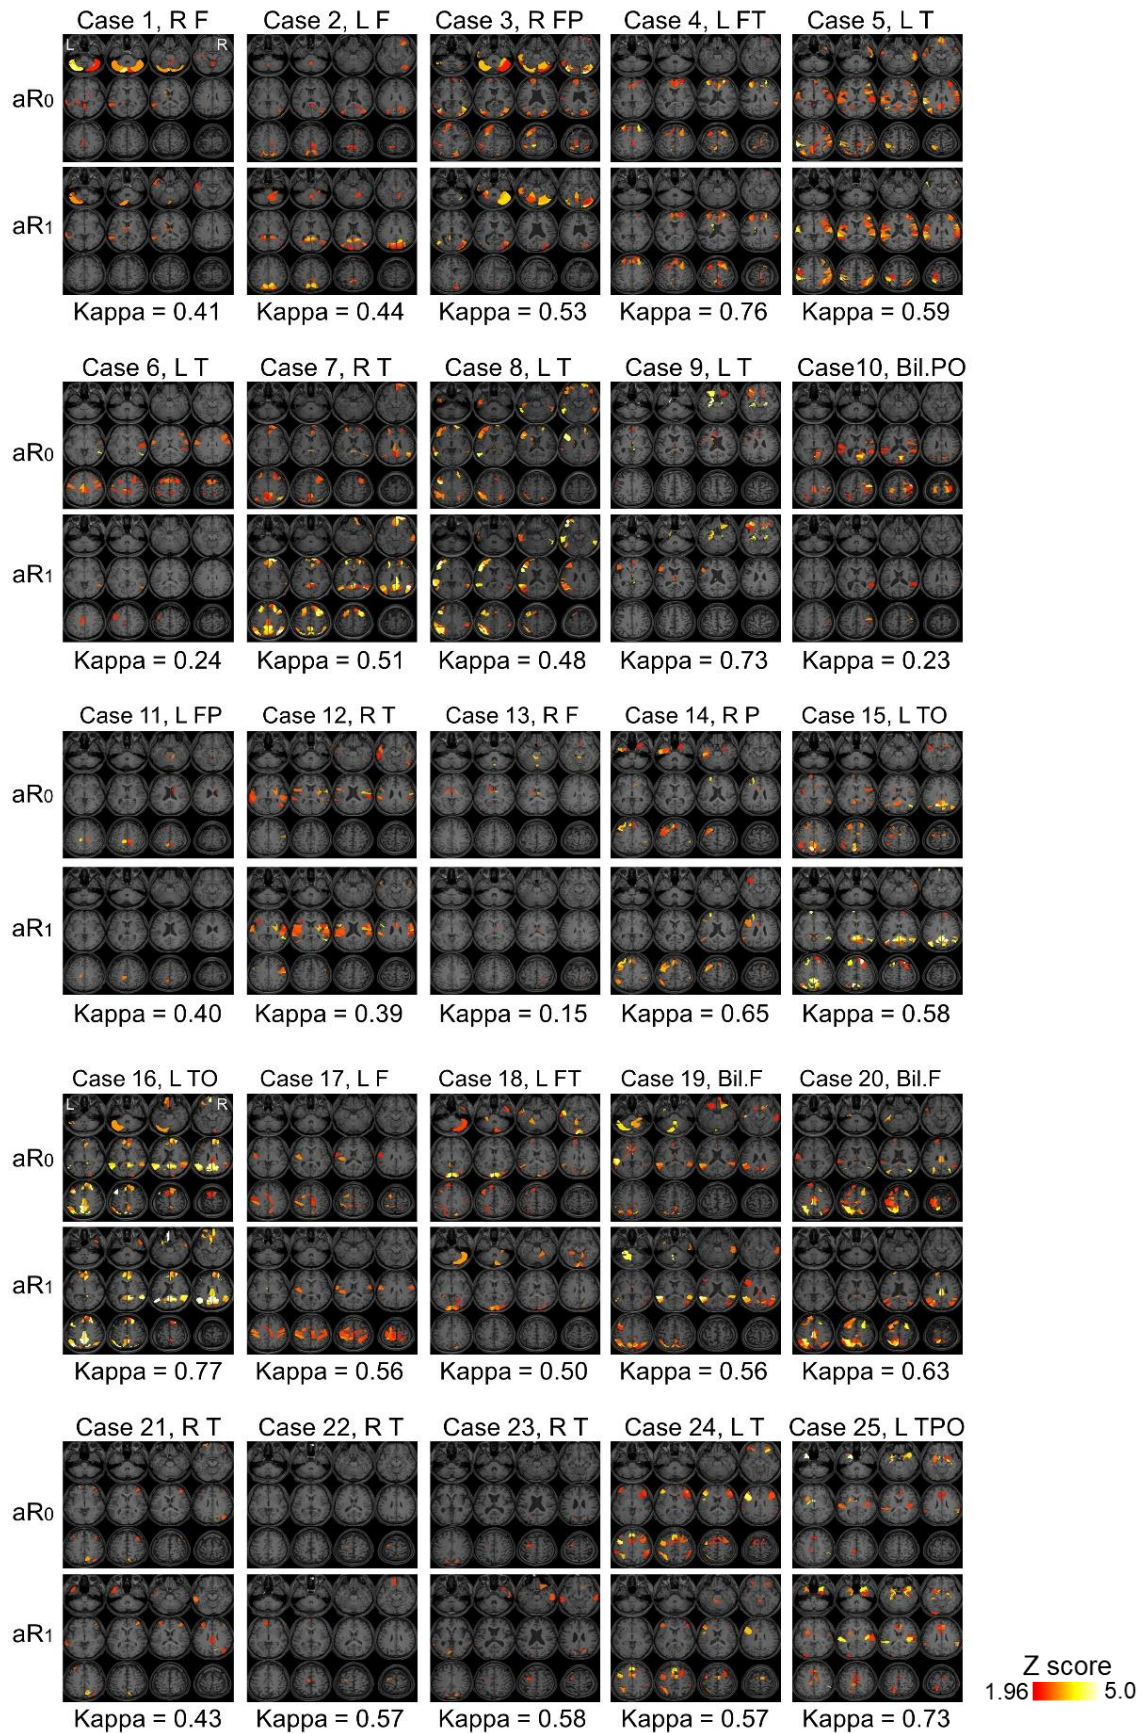

**Supplementary Figure S6: The spatial distributions of aR<sub>0</sub> and aR<sub>1</sub> and values of kappa statistic for all cases.**

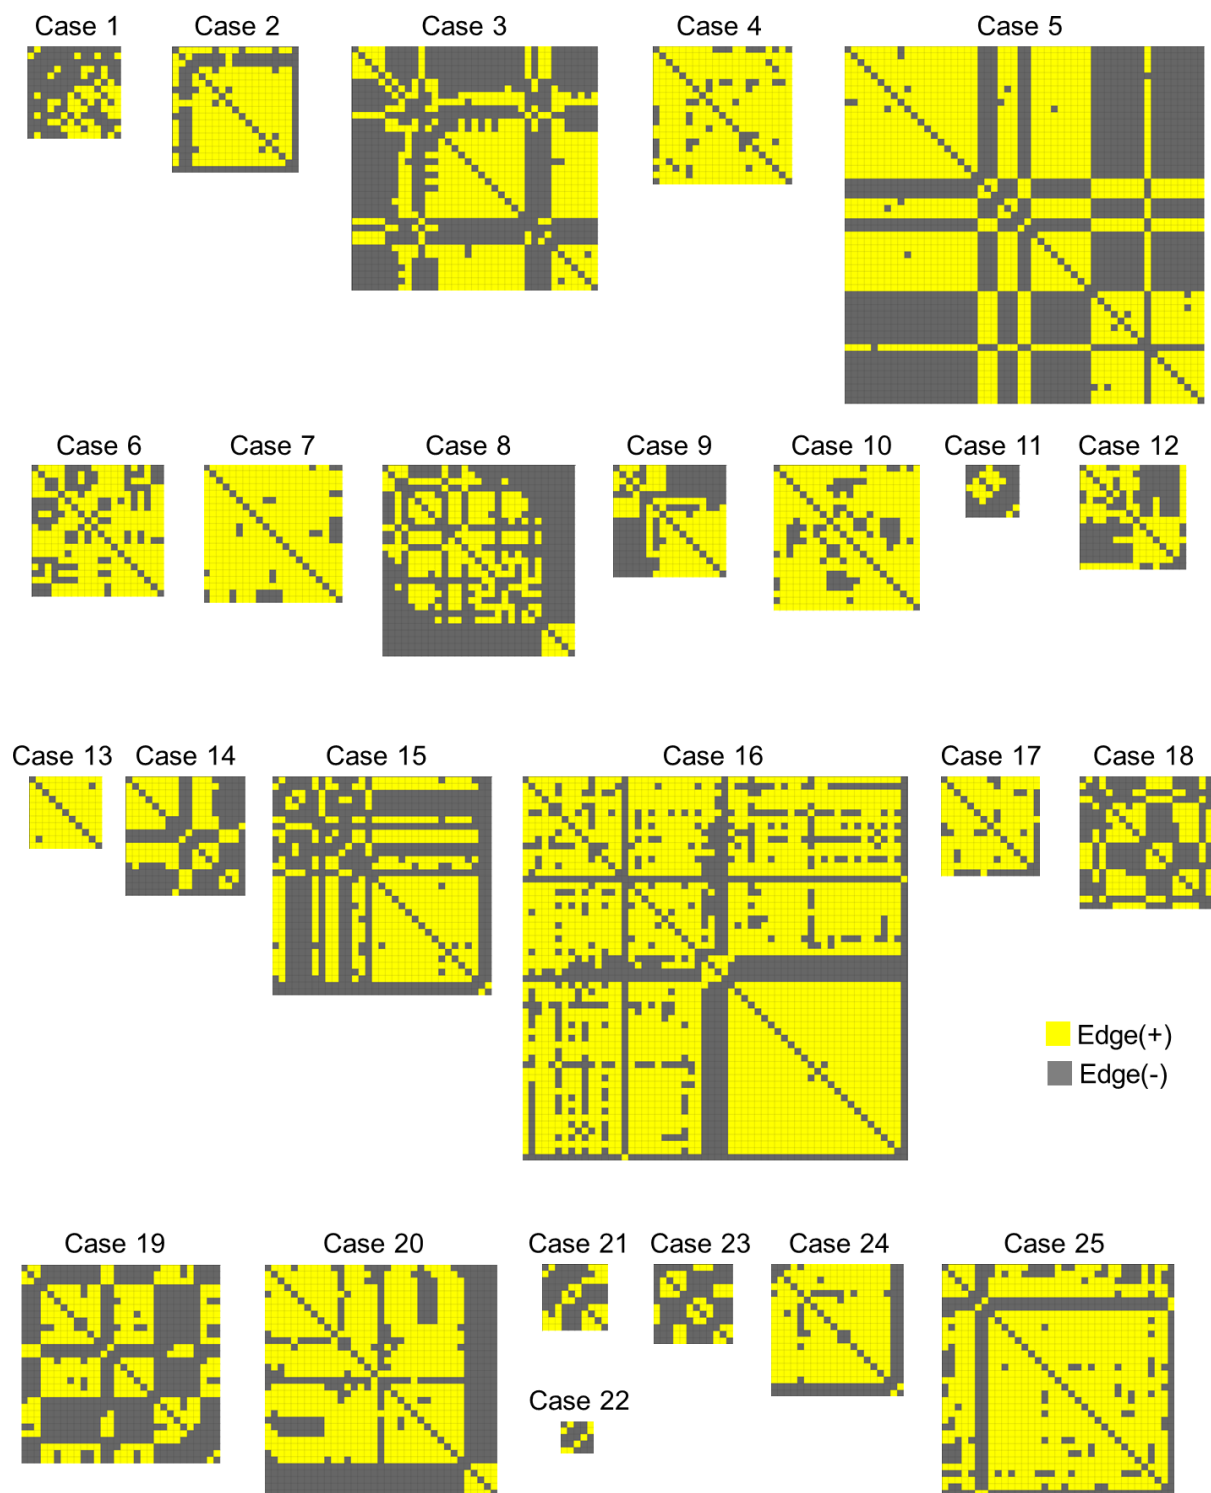

**Supplementary Figure S7: Visual matrix of the functional connectivity (edge) between each abnormal region ( $aR_0$ ) for all cases.**
